# Supplementary material for: An Immunogenic and Slow-Growing Cryptococcal Strain Induces a Chronic Granulomatous Infection in Murine Lungs
Source: PubMed Central journal article supplement (PMC9202370; doi:10.1128/iai.00580-21), 2022-05-19
Supplement: iai.00580-21-s0001.pdf [file iai.00580-21-s0001.pdf]

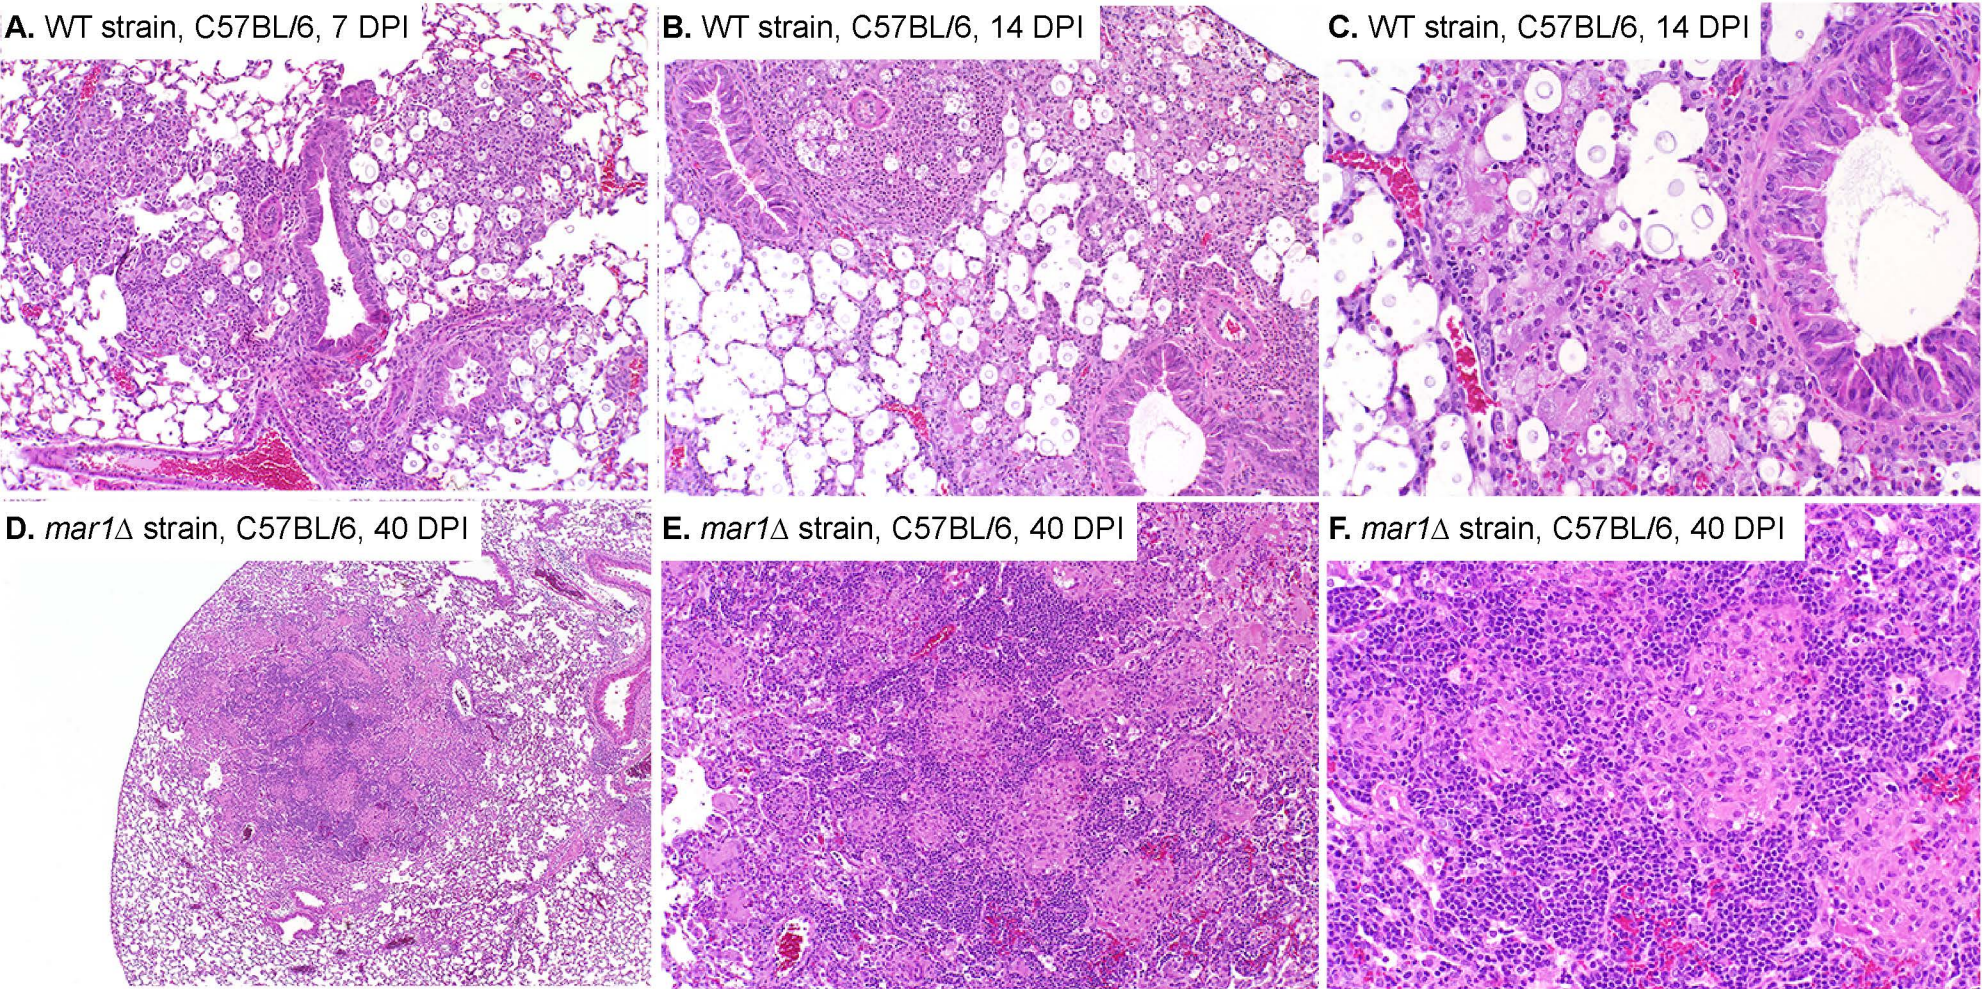

**Figure S1. Additional hematoxylin- and eosin-stained histopathology images of the C57BL/6 granulomatous response.** A. Lungs from a C57BL/6 mouse inoculated with  $1 \times 10^5$  WT cells harvested at 7 DPI demonstrated a moderate peribronchiolar neutrophilic and mononuclear inflammatory reaction with vague, early, and poorly formed granulomatous region formation (10X). B. Lungs from a C57BL/6 mouse inoculated with  $1 \times 10^5$  WT cells harvested at 14 DPI demonstrated moderate peribronchiolar nodular inflammatory aggregates accompanying a high organism burden (10X). C. A higher power image of (B) showed giant cells present without more discrete granuloma formation (20X). D. Lungs from a C57BL/6 mouse inoculated with  $1 \times 10^5$  *mar1*Δ mutant cells harvested at 40 DPI showed a relatively well-circumscribed nodule containing well developed organizing lymphohistiocytic inflammation (4X). E. A medium power image of (D) highlighted compact histiocytic aggregates and peripheral mononuclear cells, characteristic of granuloma formation (10X). F. A higher power image of (E) further highlighted compact histiocytic aggregates and peripheral mononuclear cells, characteristic of granuloma formation (20X). DPI = days post-inoculation.



**A.** *mar1* $\Delta$  strain, C57BL/6, 28 DPI

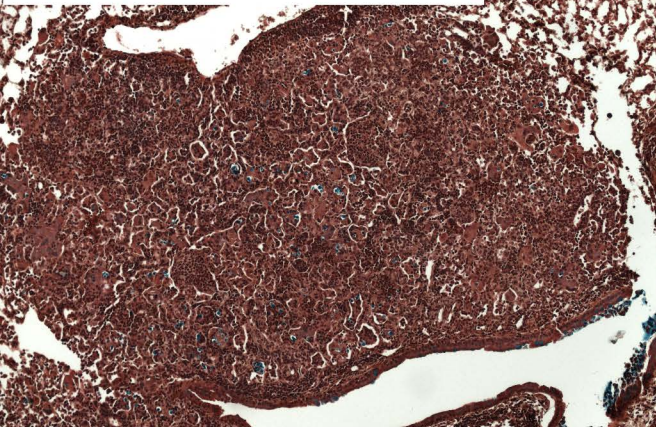

**B.** *mar1* $\Delta$  strain, C57BL/6, 28 DPI

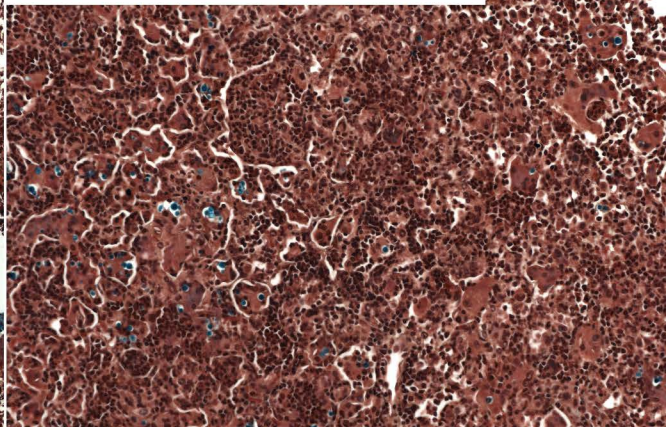

**Figure S2. Movat-stained histopathology images of the C57BL/6 granulomatous response.** A. Lungs from a C57BL/6 mouse inoculated  $1 \times 10^5$  *mar1* $\Delta$  mutant cells harvested at 28 DPI demonstrated leukocyte recruitment (dark red), fibrotic tissue formation (light red), and fungal cell (blue) containment within the borders of the granulomatous region (10X). B. A higher power image of (A) (20X). DPI = days post-inoculation.

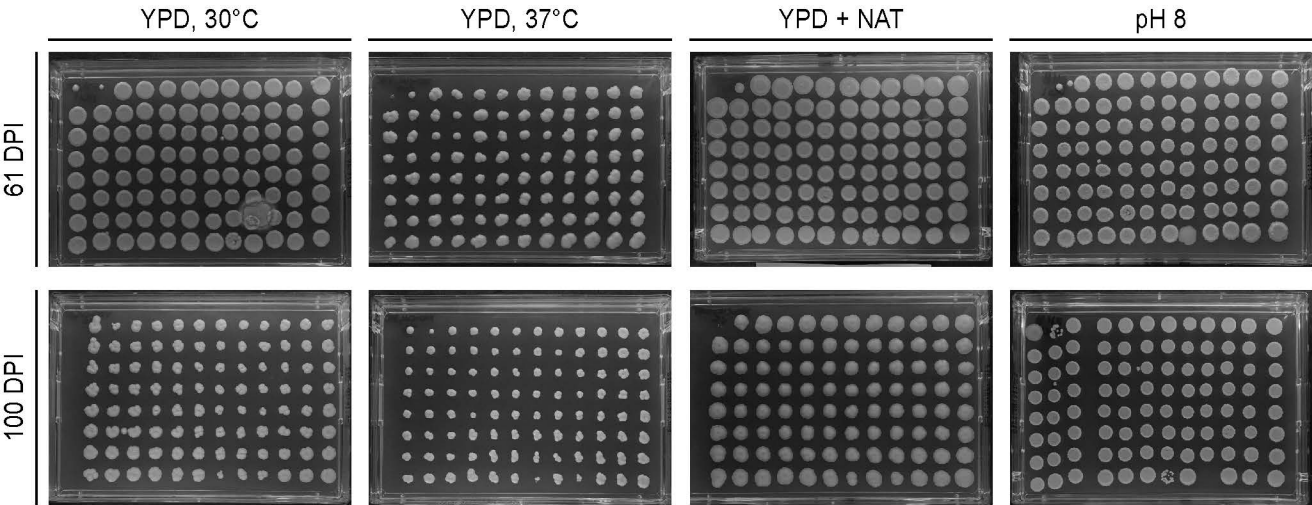

**Figure S3. Recovery of *mar1* $\Delta$  mutant cells from murine lungs at extended timepoints in infection.** Lungs from female C57BL/6 mice infected with  $1 \times 10^5$  *mar1* $\Delta$  mutant cells were harvested at 61 and 100 DPI. Single fungal colonies were isolated on YPD agar plates and subsequently incubated in various conditions that allowed for identification of *mar1* $\Delta$  mutant isolates: YPD medium at 30°C, YPD medium at 37°C, YPD medium + nourseothricin (NAT), and YPD medium pH 8.15. The original WT strain (A1) and *mar1* $\Delta$  mutant strain (A2) are included as controls in each condition. DPI = days post-inoculation.

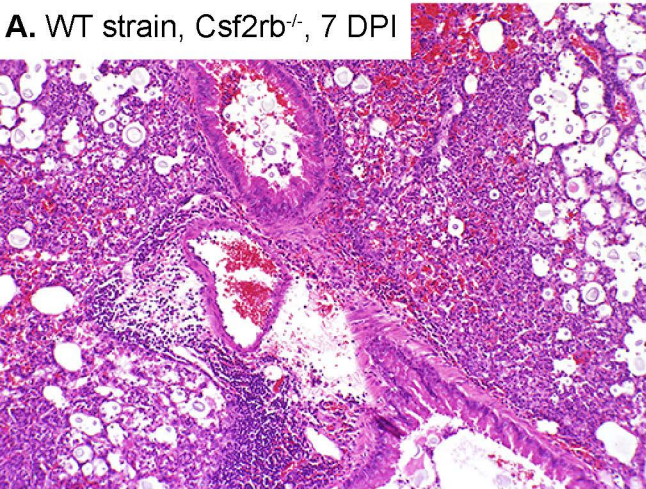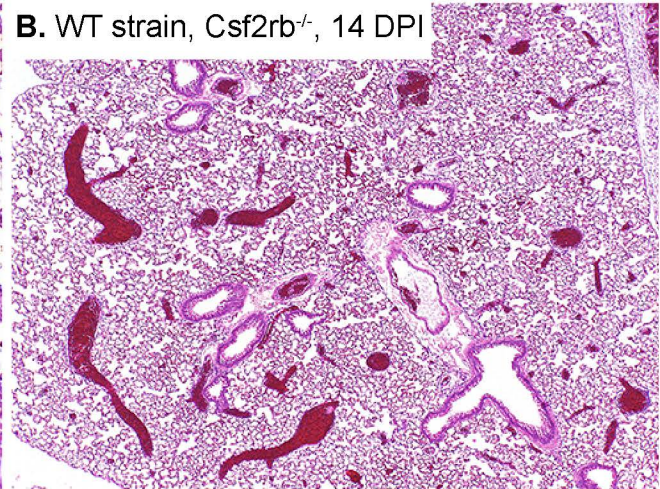

**Figure S4. Additional histopathology images of the *Csf2rb*<sup>-/-</sup> granulomatous response.** A. Lungs from a *Csf2rb*<sup>-/-</sup> mouse inoculated with  $1 \times 10^5$  WT cells harvested at 7 DPI showed a marked peribronchiolar neutrophilic and mononuclear inflammatory reaction without granulomatous region formation (10X). B. Lungs from a *Csf2rb*<sup>-/-</sup> mouse inoculated with  $1 \times 10^5$  WT cells harvested at 14 DPI demonstrated an absence of a significant inflammatory reaction (4X). All images are of hematoxylin- and eosin-stained tissue sections. DPI = days post-inoculation.



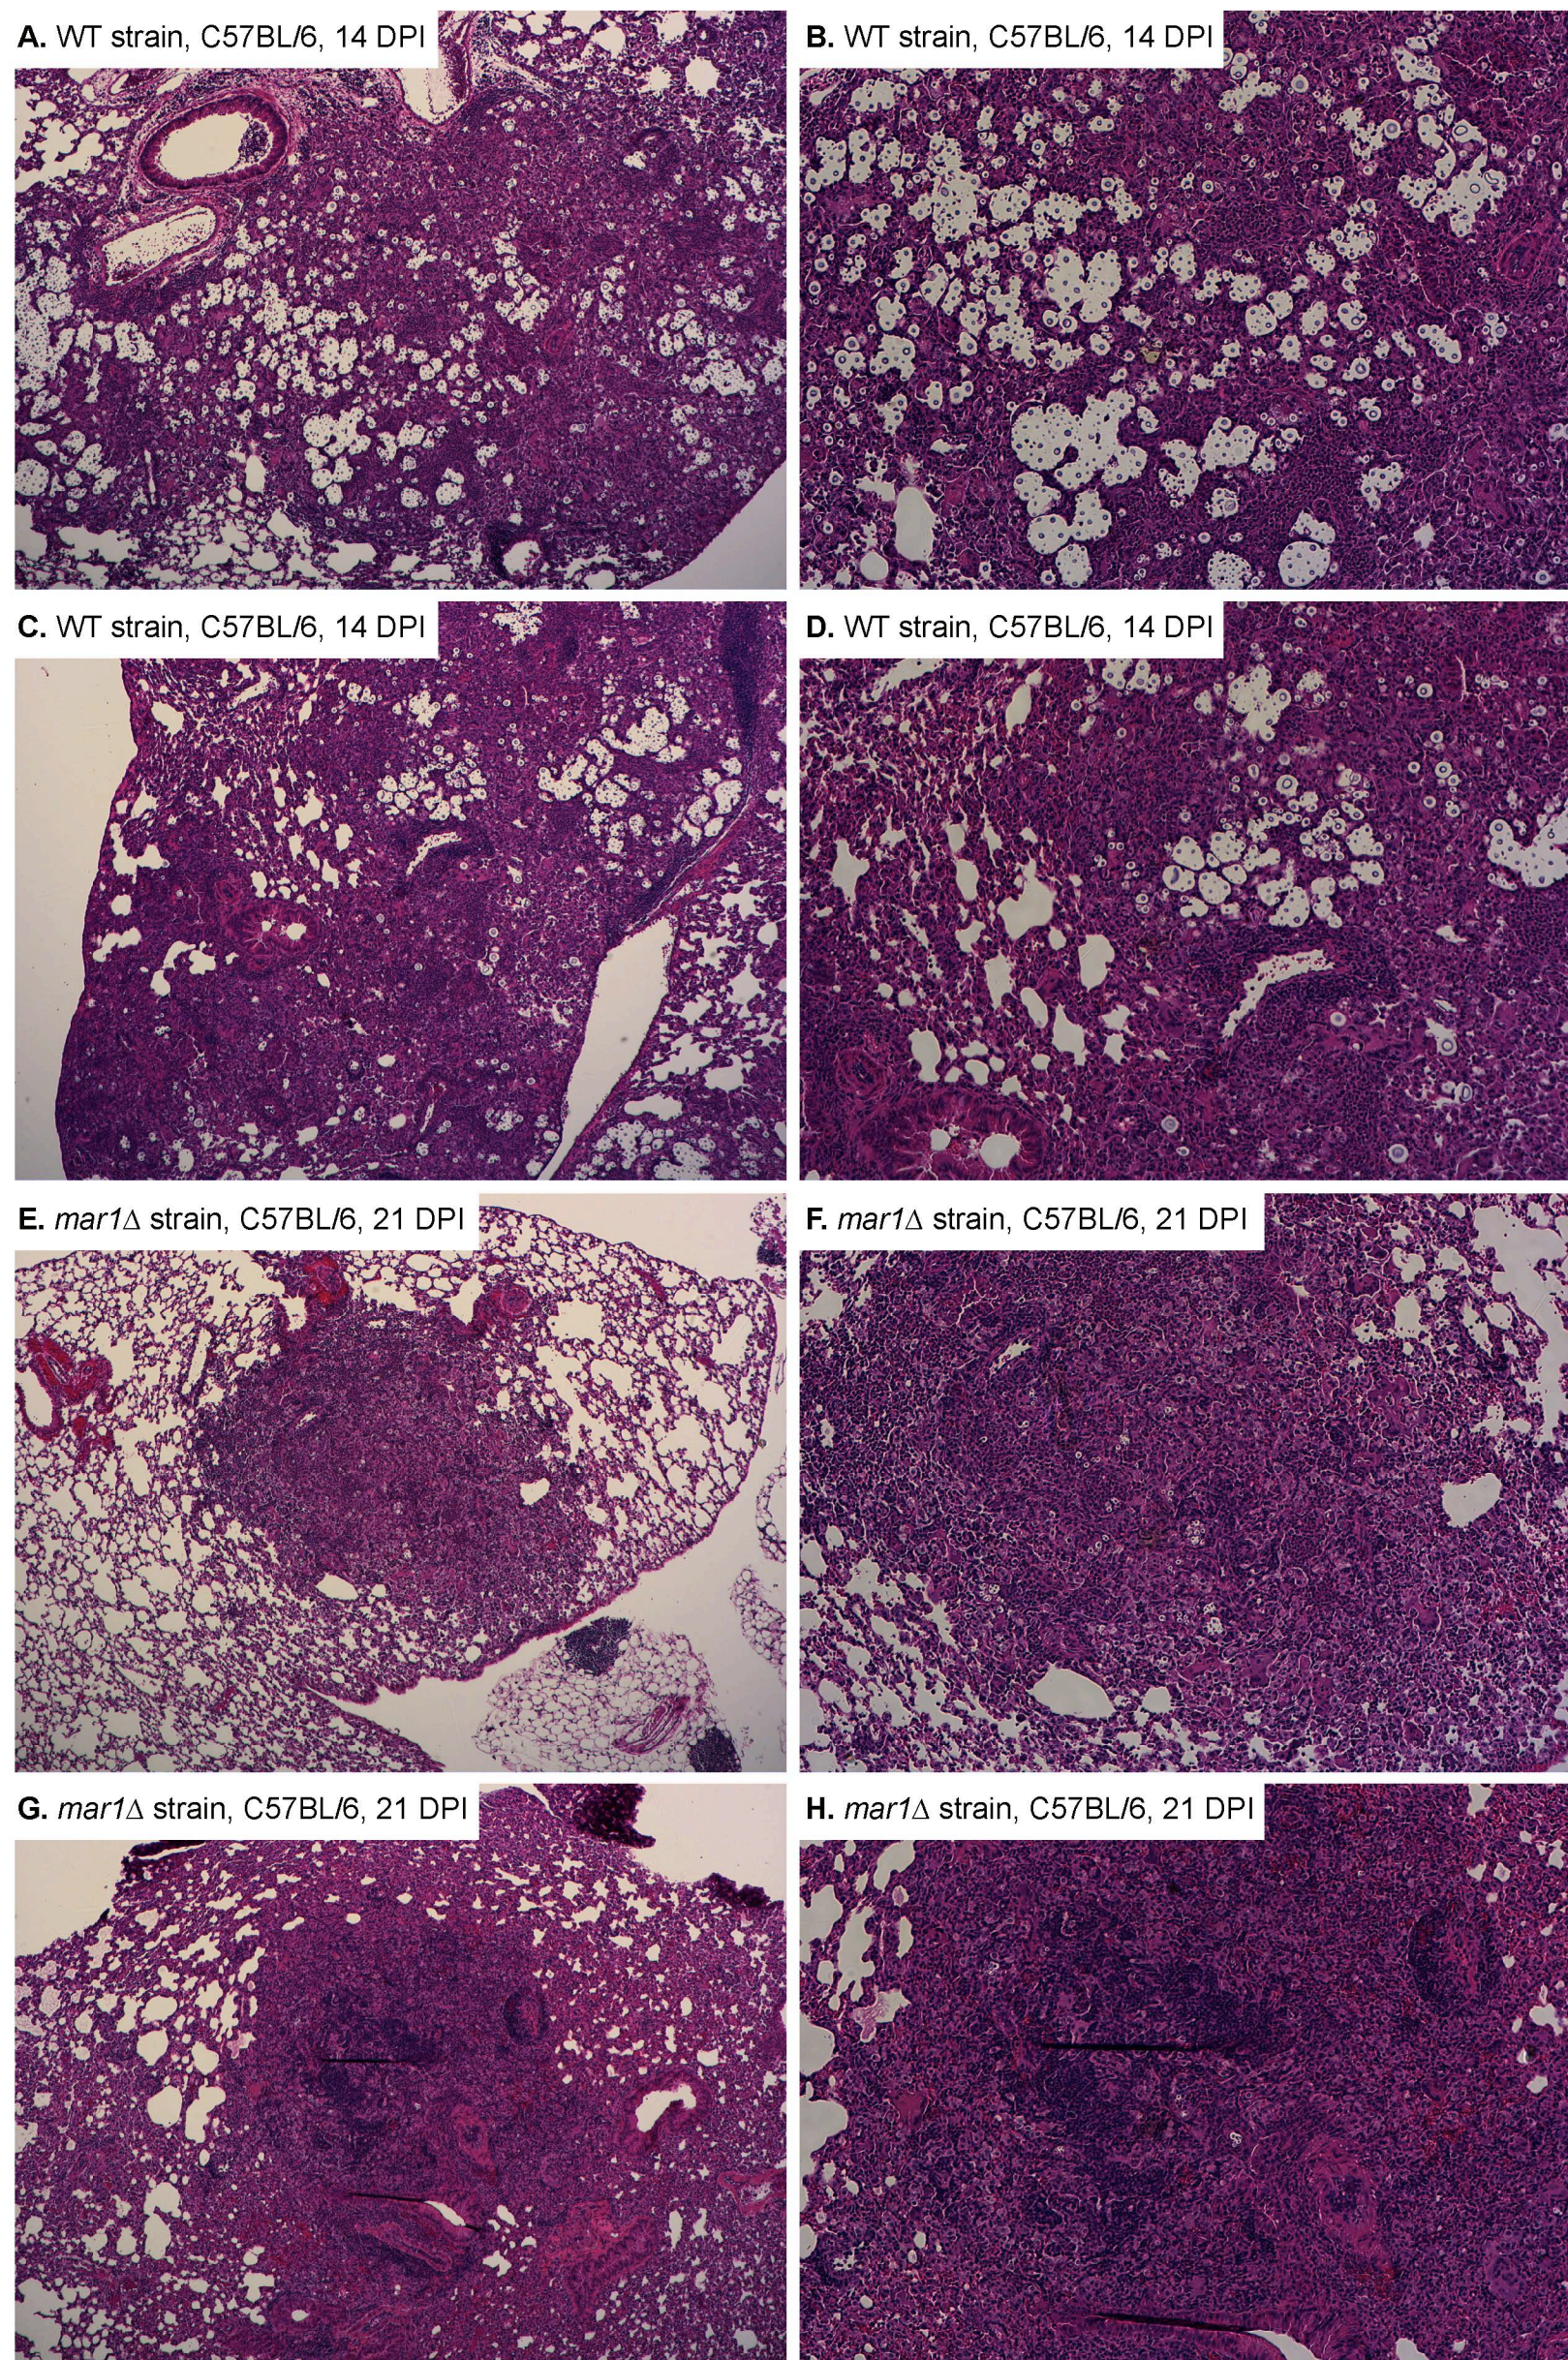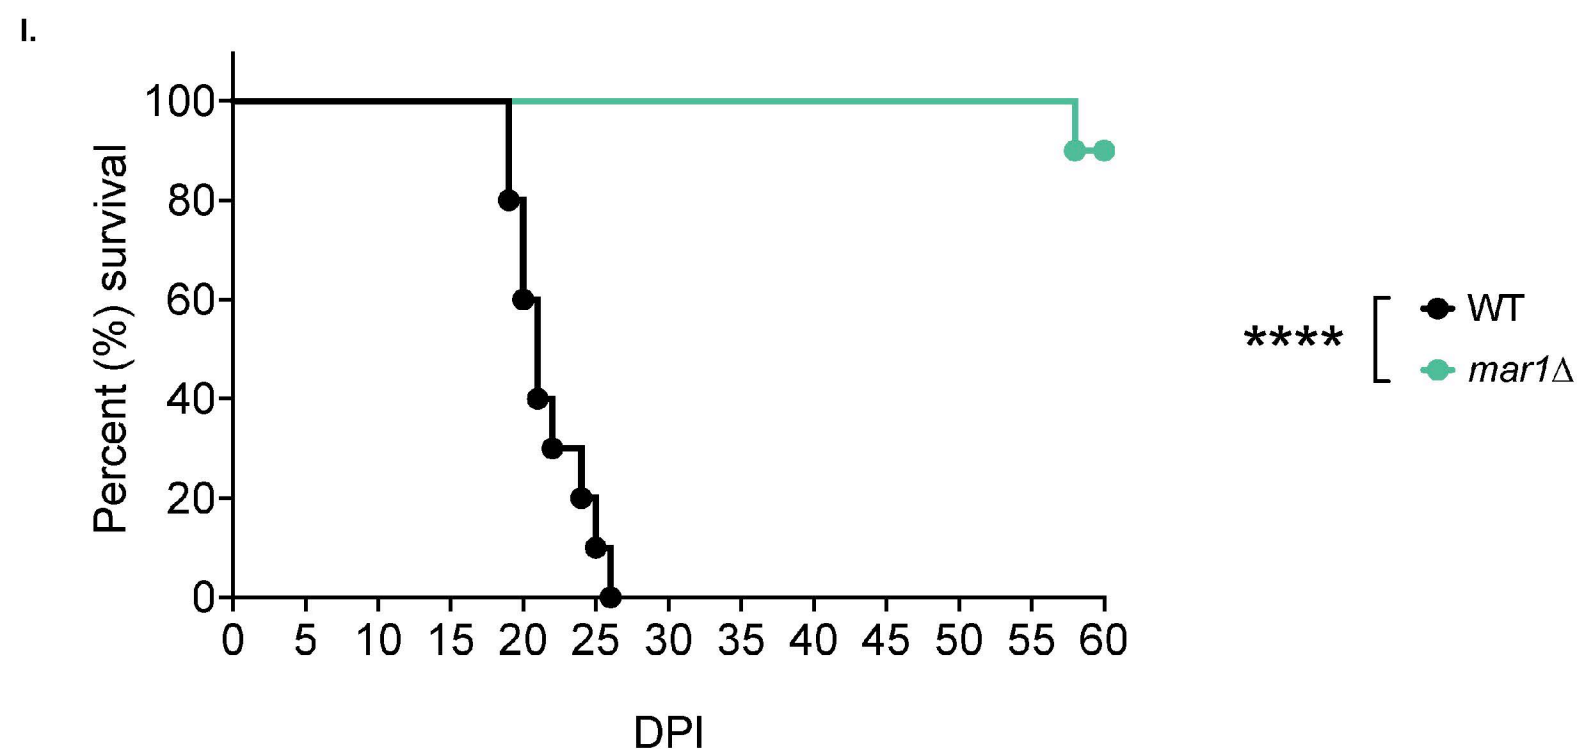

**Figure S5. Murine infections with  $1 \times 10^4$  CFU inoculum.** A-D. Lungs from C57BL/6 mice inoculated with  $1 \times 10^4$  WT cells harvested at 14 DPI demonstrated moderate inflammatory aggregates accompanying a high organism burden. Low power images (A & C) (4X) and medium power images (B & D) (10X) are included. E-H. Lungs from C57BL/6 mice inoculated with  $1 \times 10^4$  *mar1Δ* mutant cells harvested at 21 DPI showed relatively well-circumscribed inflammatory nodules containing well developed organizing lymphohistiocytic inflammation. Low power images (E & G) (4X) and medium power images (F & H) (10X) are included. I. Female C57BL/6 mice ( $n = 10$ ) were inoculated with  $1 \times 10^4$  CFU of the WT strain or the *mar1Δ* mutant strain. Mice were monitored daily for 60 days and sacrificed at predetermined clinical endpoints predictive of mortality. Statistical significance was determined by log-rank test with Bonferroni correction (\*\*\*\*,  $P < 0.0001$ ). DPI = days post-inoculation.



Cytokines:

■ WT ■ *mar1*Δ

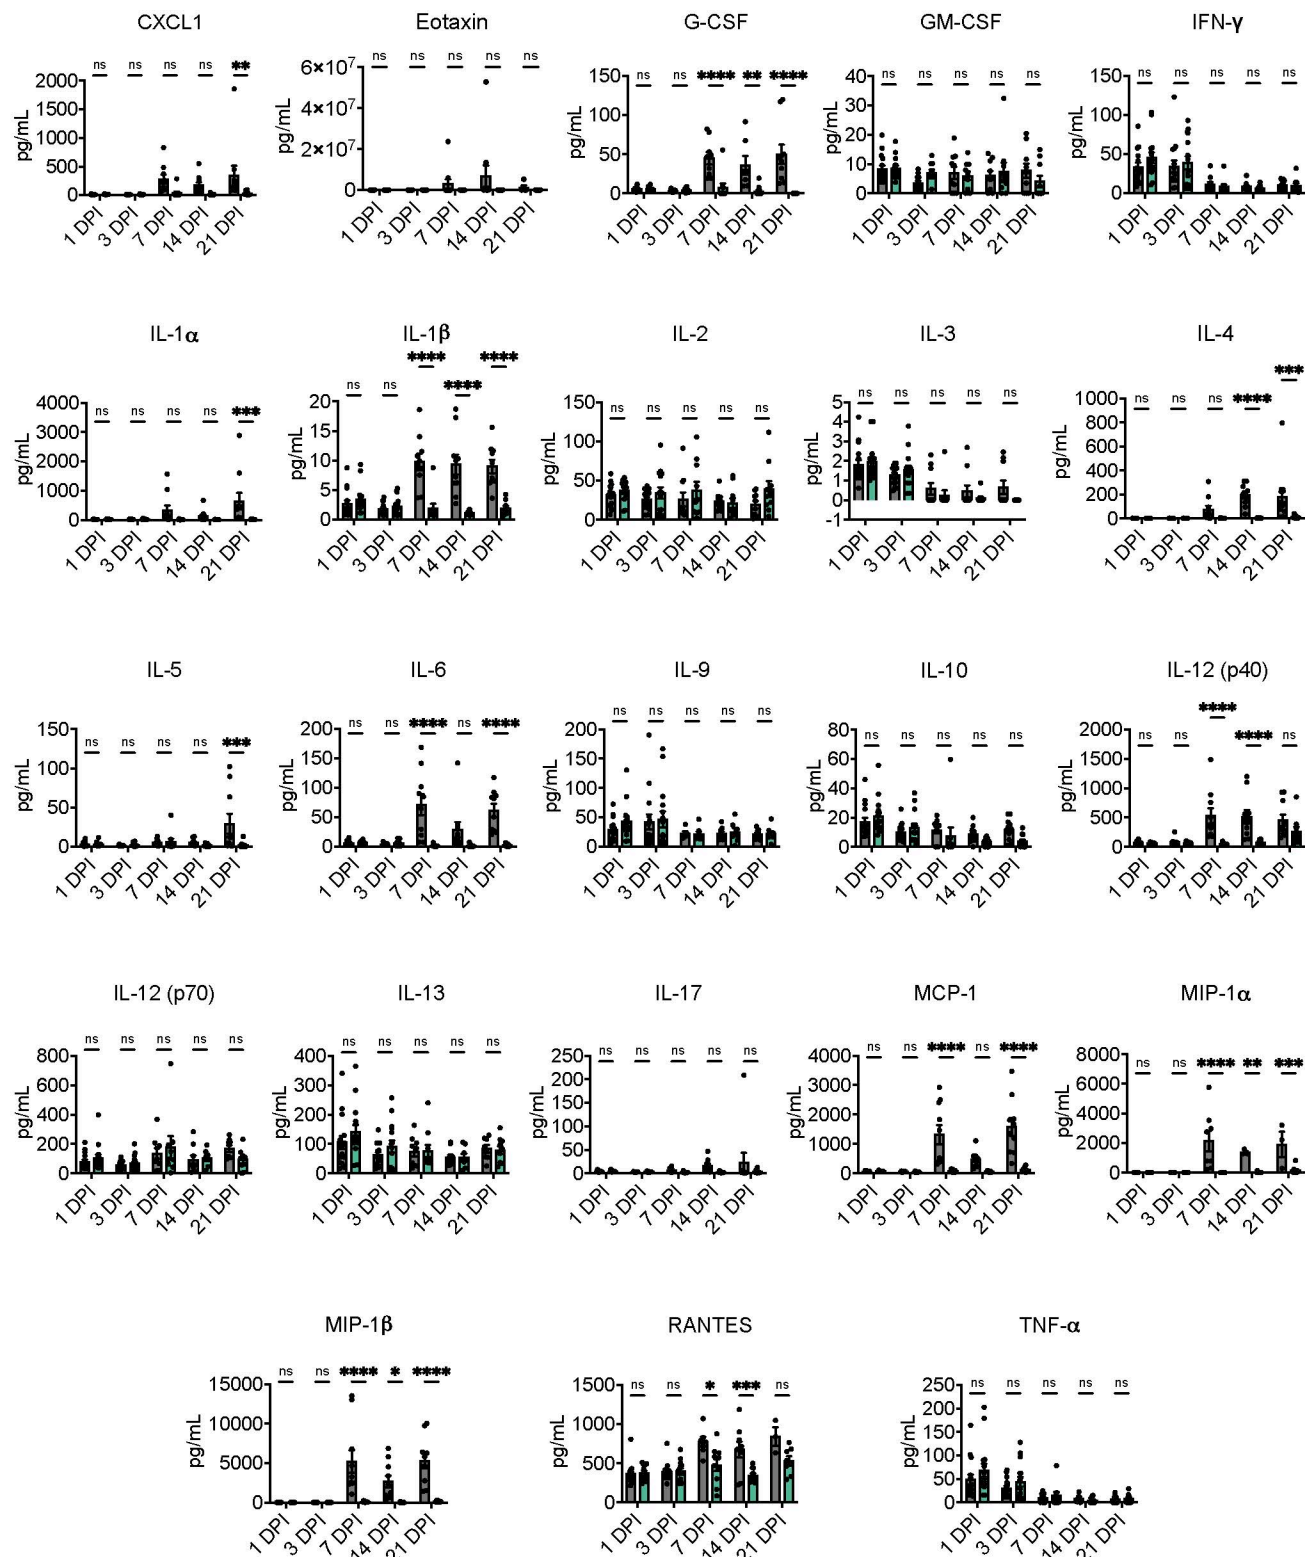

**Figure S6. Complete pulmonary cytokine profile throughout infection.** Pulmonary cytokine responses of female C57BL/6 mice inoculated with 1 x 10<sup>4</sup> cells of the WT strain or the *mar1*Δ mutant strain were measured using the Bio-Plex protein array system throughout infection: 1 (*n* = 15), 3 (*n* = 15), 7 (*n* = 10), 14 (*n* = 10), and 21 (*n* = 10) DPI. Error bars represent SEM. Statistical significance between strains at each timepoint was determined using two-way ANOVA (\*, *P* < 0.05; \*\*, *P* < 0.01; \*\*\*, *P* < 0.001; \*\*\*\*, *P* < 0.0001; ns, not significant). DPI = days post-inoculation.

# Leukocytes:

■ WT   ■ *mar1* $\Delta$

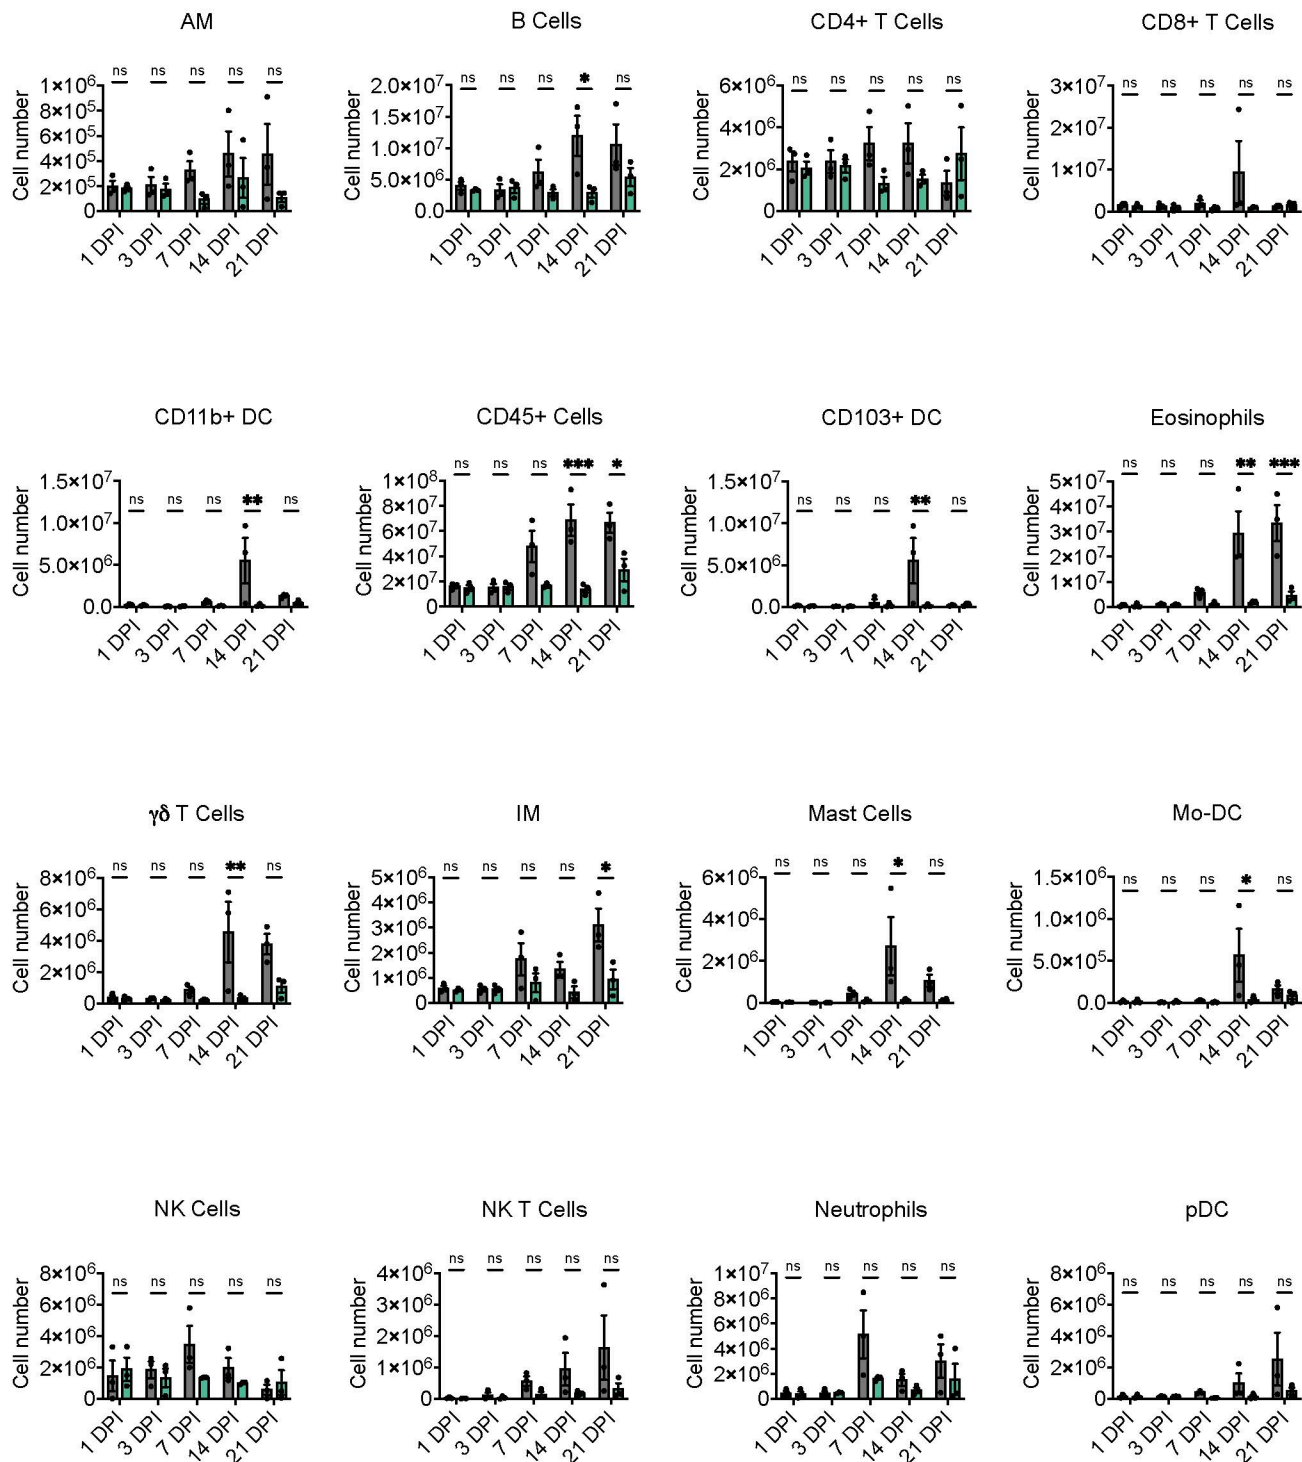

**Figure S7. Complete pulmonary leukocyte infiltrate response throughout infection.** Pulmonary leukocyte infiltrates of female C57BL/6 mice inoculated with  $1 \times 10^4$  cells of the WT strain or the *mar1* $\Delta$  mutant strain were measured by flow cytometry throughout infection: 1, 3, 7, 14, and 21 DPI. Data shown are the mean  $\pm$  of absolute cell numbers from three independent experiments ( $n = 3$ ) performed using five mice per group per timepoint per experiment. Error bars represent the SEM. Statistical significance between strains at each timepoint was determined using two-way ANOVA (\*,  $P < 0.05$ ; \*\*,  $P < 0.01$ ; \*\*\*,  $P < 0.001$ ; ns, not significant). DPI = days post-inoculation.

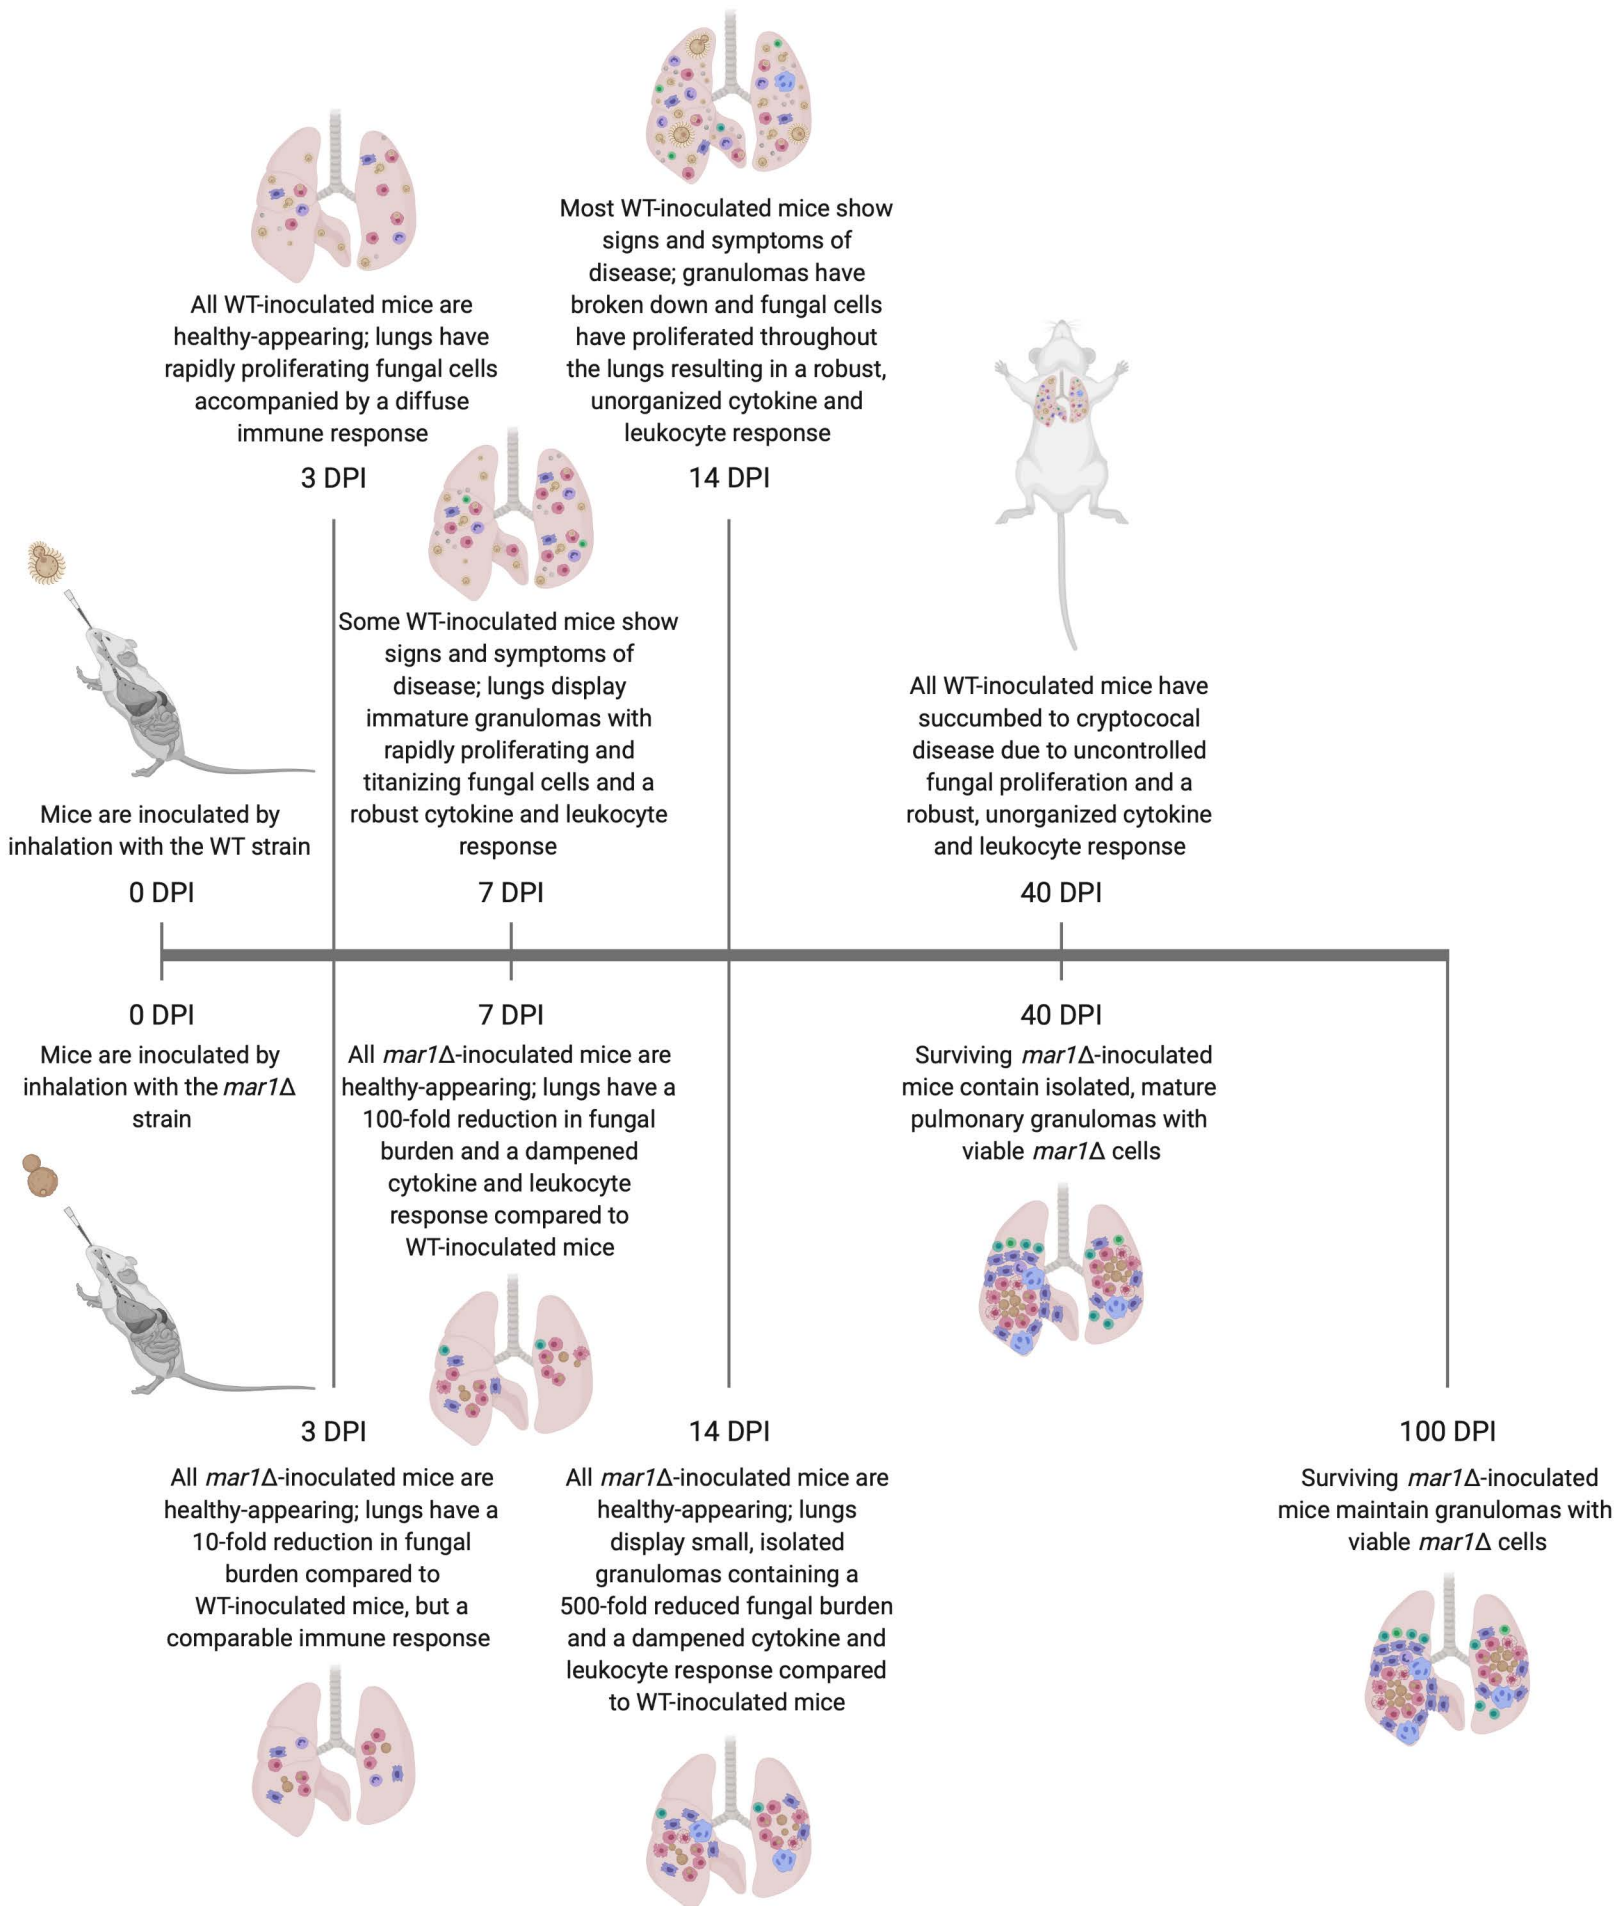

**Figure S8. Granulomatous response timeline.** Chronological summary of important observations about granulomatous region formation and maintenance in the WT strain (top) and *mar1Δ* mutant strain (bottom) backgrounds. Cartoons adapted from BioRender.com (2021). DPI = days post-inoculation.
